# Supplementary material for: Effectiveness of Cement Augmentation on Early Postoperative Mobility in Patients Treated for Trochanteric Fractures with Cephalomedullary Nailing: A Prospective Cohort Study
Source: MDPI journal article supplement (doi:10.3390/jpm12091392), 2022-08-27
Supplement: s1 [file s1]

**Supplemental Table S1.** Multivariable linear regression analysis for clinical outcomes except cumulated ambulation score

|                           | Adjusted R <sup>2</sup> | Adjusted beta (95% CI)   | P Value |
|---------------------------|-------------------------|--------------------------|---------|
| VAS during movement, day2 | 0.06                    |                          | 0.119   |
| Age                       |                         | -0.03 (-0.12 to 0.07)    | 0.58    |
| Dementia                  |                         | 0.94 (0.16 to 1.72)      | 0.02    |
| CCI                       |                         | -0.22 (0.16 to 1.72)     | 0.31    |
| Cement augmentation       |                         | -0.99(-2.15 to 0.44)     | 0.12    |
| VAS during movement, day3 | 0.17                    |                          | 0.004   |
| Age                       |                         | -0.05 (-0.14 to 0.05)    | 0.31    |
| Dementia                  |                         | 0.95 (0.14 to 1.76)      | 0.02    |
| CCI                       |                         | -0.17 (-0.62 to 0.27)    | 0.03    |
| Cement augmentation       |                         | -2.36 (-3.67 to -1.06)   | 0.001   |
| Barthel index, 1 week     | 0.44                    |                          | <0.001  |
| Age                       |                         | -0.93 (-1.68 to -0.20)   | 0.01    |
| Dementia                  |                         | -12.59 (-18.95 to -6.24) | <0.01   |
| CCI                       |                         | -1.29 (-4.78 to 2.21)    | 0.46    |
| Cement augmentation       |                         | 8.60 (-1.60 to 18.79)    | 0.10    |

VAS, visual analog scale
